# Supplementary material
Source: PubMed Central journal article supplement (PMC2151787)
Supplement: bjpg57-723FigureS1.pdf [file bjpg57-723FigureS1.pdf]

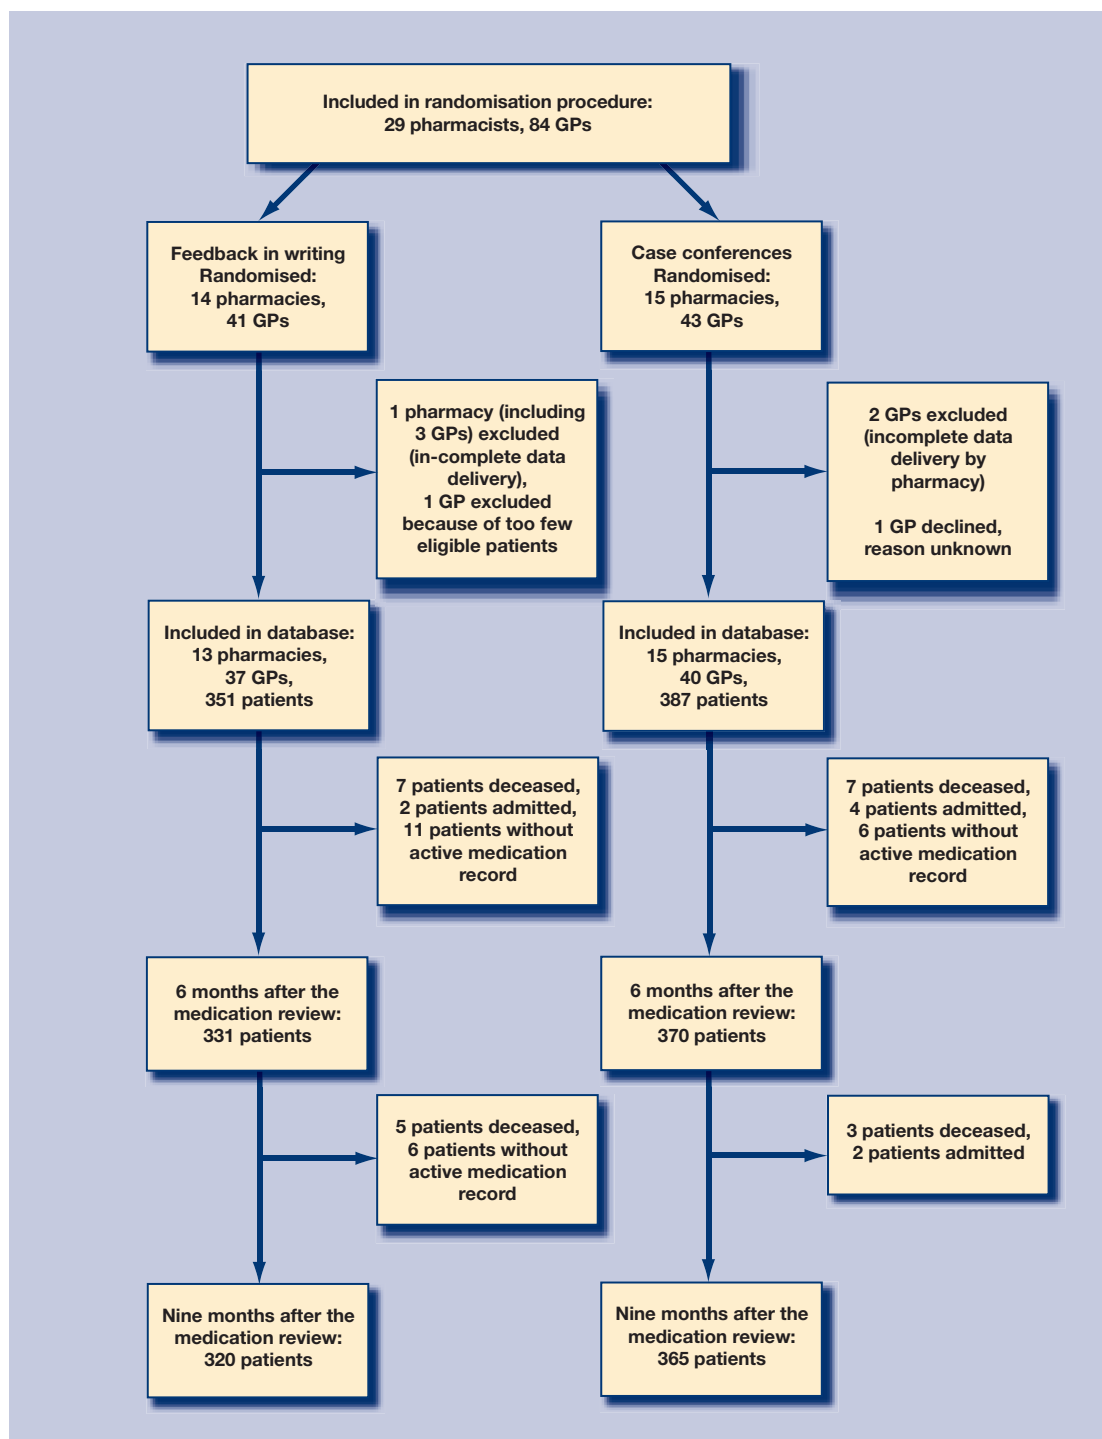

Supplementary Figure 1. Inclusion and exclusion of participants and patients in a randomised controlled trial comparing two procedures for medication reviews concerning home-dwelling older people on polypharmacy in primary care.
